# Supplementary material for: Loss of AIM2 expression promotes hepatocarcinoma progression through activation of mTOR-S6K1 pathway
Source: PubMed Central journal article supplement (PMC5094992; doi:10.18632/oncotarget.9154), 2016-05-04
Supplement: oncotarget-07-36185-s001.pdf [file oncotarget-07-36185-s001.pdf]

## Loss of AIM2 expression promotes hepatocarcinoma progression through activation of mTOR-S6K1 pathway

### Supplementary Materials

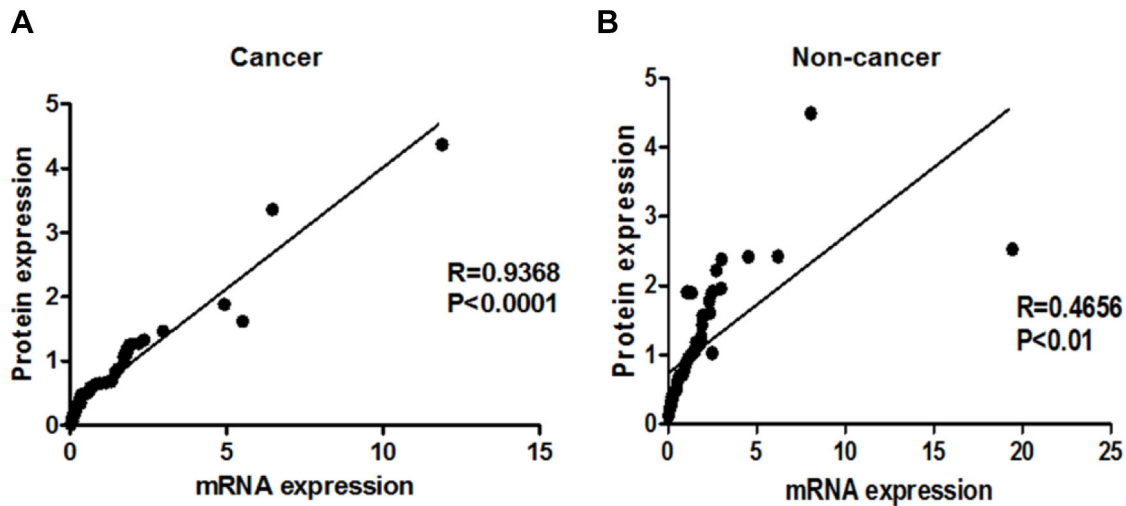

**Supplementary Figure S1: Correlation analysis of the mRNA and protein level of AIM2 expression.** (A–B) AIM2 mRNA and protein expression were detected by real-time PCR and western blot, respectively. Correlation of AIM2 mRNA and protein levels in liver cancer tissues (A) and non-cancerous liver tissues (B) were presented.

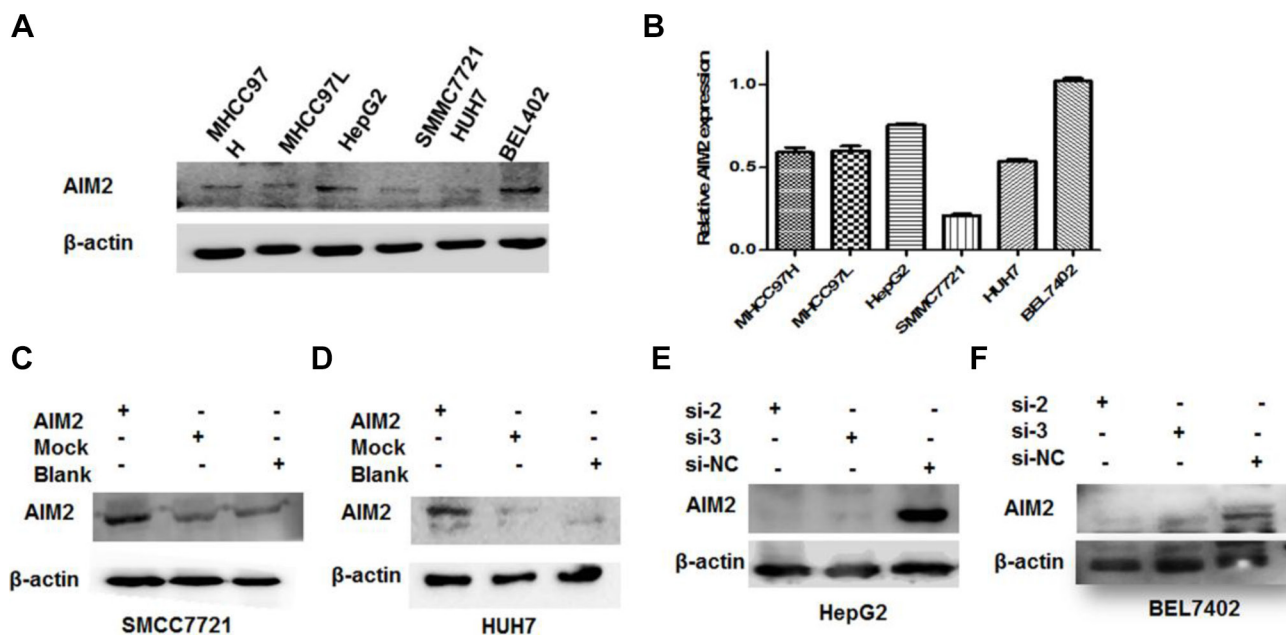

**Supplementary Figure S2: AIM2 expression was detected in six human liver cancer cell lines.** (A) Western blot was used to determine the AIM2 protein expression in 6 human HCC cell lines. (B) Band intensity analysis was done to compare the relative level of AIM2 in these 6 detected HCC cell lines. (C–D) SMCC7721(C) and Huh7 cells (D) were transfected with 2 $\mu$ g EGFP-AIM2 plasmid to confirmed the efficiently overexpression of AIM2 in these HCC cells. Cells transfected with empty vectors were used as mock control. (E–F) Western blot was performed in two AIM2 highly expressed HCC cell lines(E for HepG2 cells and F for BEL7402 cells ) to detect the inhibitory efficacy of three synthesized siRNA(siRNA-1 and siRNA-3) specifically targeting AIM2.

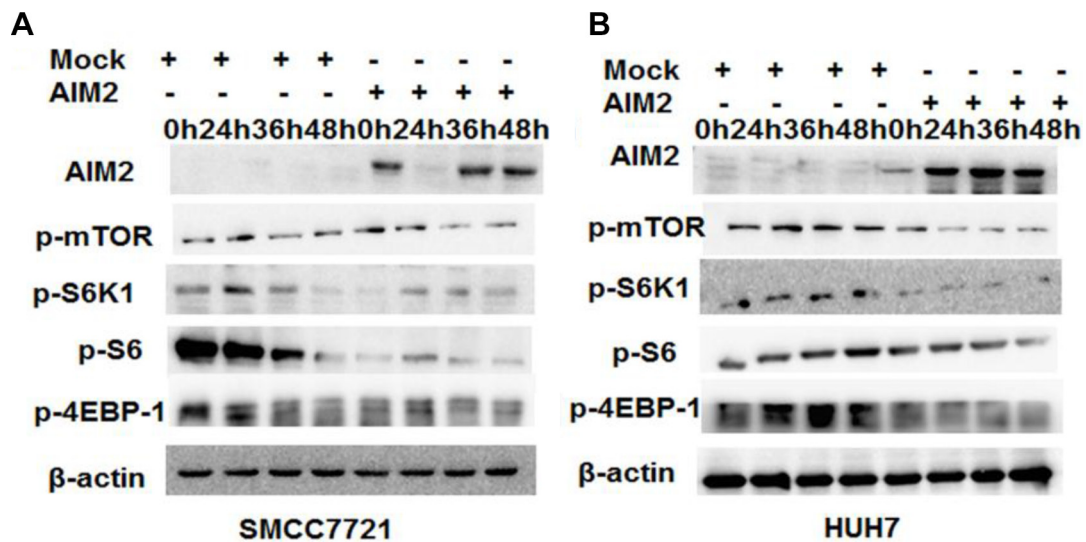

**Supplementary Figure S3: Effect of exogenous overexpression of AIM2 on the activation of mTOR-S6K1 pathway.** (A-B) After transfection of AIM2 expression plasmid or mock plasmid to SMCC7721(A) and HUH7 (B) cells, the cells were further cultured for 0 h, 24 h, 36 h and 48 h before harvested for western blot analysis of the mTOR-S6K1 pathway activation.
